# Supplementary material
Source: publisher figshare collection journal article supplement (https://gsapubs.figshare.com/ndownloader/files/23304263)
Supplement: Supplementary file 1 [file 23304263]

Edward W. Marshall, John C. Lassiter, Jaime D. Barnes, Ambre Luguët, and Moritz Lissner, 2017, Mantle melt production during the 1.4 Ga Laurentian magmatic event: Isotopic constraints from Colorado Plateau mantle xenoliths: *Geology*, doi:10.1130/G38891.1

1    **Appendix 1**

2

3    **Sample Petrology:**

4            This section presents a mineralogic and petrographic summary of each  
5   sample. Mineral modal abundances are visually estimated in thin section, not point  
6   counted. All samples were spinel peridotites, except N23-GN, EMGN21, EMGN24,  
7   N106-GN and N55-GN. N23-GN was interpreted by Roden et al. (1990) to have been  
8   garnet peridotite with garnets having been replaced by chlorite. Their  
9   interpretation was based largely on HREE depletion in clinopyroxene, which is  
10   typical of cpx in equilibrium with garnet, and the garnet-like shape of the chlorite  
11   clusters. We have identified two other xenoliths with cpx REE patterns similar to  
12   N23-GN: EMGN21 and EMGN24. Both of these samples have depleted HREE  
13   concentration and chlorite interpreted as replacing garnet, similar to N23-GN. N55-  
14   GN has garnet rims around Al-spinel cores (see Smith and Levy, 1976). N106-GN  
15   was noted to have garnet rims around spinel (personal communication, D. Smith),  
16   but we were unable to confirm this texture.  
17

Our petrologic observations agree with the findings of Smith (1979) that Green Knobs (35.9533° N, 109.0227° W) xenoliths have three hydrous peridotite assemblages:

1) Mineral assemblages that contain *aluminous-spinel* (Al-Spinel) and are poor in hydrous phases (~ <5% by mode).

2) Mineral assemblages that contain amphibole and chlorite. These samples generally all contain *chlorite clusters*-- a textural feature formed by aluminous phases (e.g., Al-spinel, garnet) reacting with fluid and olivine to form chlorite. In spinel peridotites, these chlorite clusters contain Cr-spinel interpreted to be the Al-depleted reaction product of the original Al-spinel.

3) Mineral assemblages that contain *abundant antigorite* relative to the other two assemblage types (>5% by mode). A key textural feature of this assemblage is that platy antigorite crystals are found throughout the sample. In addition, antigorite rims chlorite clusters and individual chlorite grains. This assemblage typically contains chlorite and amphibole in addition to serpentine.

Moses Rock (37.1081°N, 109.7841°W) peridotite xenoliths contain similar textures to Green Knobs peridotites and range from nearly anhydrous peridotites to fully hydrated assemblages (assemblages containing only hydrous phases with rare/absent relict grains, e.g. EMMR4). On average, Moses Rock xenoliths tend to have a greater abundance of hydrous minerals compared to Green Knobs, as McGetchin and Silver (1970, 1972) found spinel peridotite much less abundant than "serpentine schist."

41

42 **Moses Rock**

43

44 **MR-ATG-13** (Sample collected by Anna T. Gavasci)

45 **Mineralogy:** ol + opx + cpx + serpentine + Al-spinel

46 **Petrography:** Spinel lherzolite with large (>5mm) opx porphyroblasts. Olivine is  
47 fractured with serpentine commonly filling the fractures. Opx, cpx, and spinel are  
48 not fractured. Serpentine < 10% by mode.

49 **Location:** 37.1081°N, 109.7841°W

50

51 **EMMR4:**

52 **Mineralogy:** Serpentine + amphibole + chlorite + opaque

53 **Petrography:** Serpentinite. All primary silicate minerals have been reacted to  
54 serpentine, chlorite and/or amphibole; no relict grains are observed in thin section.  
55 However, relict grains were found in crushed mineral separates. Thin bands of  
56 opaque minerals (likely Cr-spinel) appear to define the grain boundaries of the  
57 serpentine and amphibole pseudomorphs. Chlorite clusters surround opaques.  
58 Fibrous amphibole grows irregularly in clusters, and along cleavages in  
59 pseudomorphous serpentine. Serpentine ~80% by mode, amphibole ~10%, chlorite  
60 ~5%,

61 **Location:** 37.1081°N, 109.7841°W

62

63 **EMMR25**

**Mineralogy:** Ol + opx + chlorite + cpx + amphibole + serpentine + opaque

**Petrography:** Hydrated lherzolite. ~1 cm clusters of chlorite surround opaques, most likely Cr-spinel. Prismatic amphibole grows along the grain boundaries of pyroxenes and rim chlorite clusters. Chlorite forms centimeter-scale clusters around spinel, but also is found intergrown with clinopyroxene. Olivine is fractured throughout the thin section, and these fractures are filled with serpentine.

**Location:** 37.1081°N, 109.7841°W

## **Green Knobs**

### **EMGN2**

**Mineralogy:** Ol + opx + cpx + Al-Spinel + serpentine

**Petrography:** Deformed equigranular spinel lherzolite. Grain boundaries are filled with very tiny, high birefringence grains. These small grains have optical properties consistent with olivine and pyroxene, but are too small to confirm. Olivines have undulose extinction and pyroxenes are kinked. Olivine is fractured, with fractures containing serpentine. Cpx is cloudy with inclusions too small to identify. Spinel is not opaque. Serpentine growth is limited to fractures and grain boundaries, making up less than 5% by mode.

**Location:** 35.9533° N, 109.0227° W

### **EMGN6**

**Mineralogy:** Ol + opx + serpentine + amphibole + chlorite + cpx

**Petrography:** Hydrated equigranular peridotite. Amphibole forms twinned, prismatic prisms that incompletely replace pyroxenes. Amphibole tends to grow across grain boundaries as far as the cores of some grains, rather than forming rims. Amphibole commonly contains abundant opaque inclusions. Chlorite is limited to thin rims around opaque grains. Occasionally chlorite is found as inclusions within amphiboles. Serpentine occurs throughout the section as slender prismatic crystals, rimming chlorite, and included in amphibole, pyroxenes and olivine. Serpentine is sometimes intergrown with amphibole and chlorite. Olivine is replaced by serpentine heterogeneously-- some olivine grains have a small amount of serpentine in fractures, other grains are almost entirely replaced as serpentine replaces olivine along [010] cleavages. A vein, now filled with serpentine, cuts across the thin section. Serpentine 15% by mode, amphibole 15% by mode, chlorite 5% by mode.

**Location:** 35.9533° N, 109.0227° W

## **EMGN9**

**Mineralogy:** Ol + opx + chlorite + opaque + amphibole + serpentine

**Petrography:** Deformed, hydrated equigranular peridotite, containing very large (>8mm) chlorite clusters around opaques. Cpx was not found in thin section, and has most likely been reacted to amphibole. Cpx was found in mineral separates. Olivine [010] cleavages define a foliation in the peridotite. Amphibole grows in prismatic grains that replace pyroxenes. Serpentine grows across pyroxenes with fanning bunches of crystals. Serpentine forms irregular masses within olivines. Chlorite is ~20-25%, amphibole ~5%, serpentine is <5% by mode.

110 **Location:** 35.9533° N, 109.0227° W

111

112 **EMGN12**

113 **Mineralogy:** Ol + Opx + amphibole + chlorite + serpentine + opaque

114 **Petrography:** Hydrated equigranular peridotite. Olivines and opx form a mosaic

115 texture, typical of mantle peridotites. Olivine is fractured and contains serpentine in

116 the fractures. Amphibole replaces pyroxene. Chlorite forms clusters around opaques

117 and is also found intergrown with amphibole. Chlorite ~10%, amphibole ~10%.

118 serpentine ~ 1% by mode.

119 **Location:** 35.9533° N, 109.0227° W

120

121 **EMGN21**

122 **Mineralogy:** Ol + opx + chlorite + serpentine + opaque.

123 **Petrography:** Hydrated equigranular harzburgite.

124 Depleted HREE in EMGN21 cpx supports the idea that EMGN21 was a garnet

125 peridotite before all garnet in the sample was reacted to chlorite.

126 Olivine displays [010] cleavage. The olivine cleavage fractures are filled with

127 serpentine. Chlorite forms clusters, containing few opaques. Olivine and opx are

128 commonly cut across by serpentine. Cpx was not found in thin section, but was

129 found in mineral separates. Chlorite ~10% by mode, serpentine ~7% by mode.

130 **Location:** 35.9533° N, 109.0227° W

131

132 **EMGN24**

**Mineralogy:** Ol + opx + serpentine + amphibole + chlorite + opaques + clinohumite  
+ carbonate

**Petrography:** Hydrated equigranular peridotite. Depleted HREE in EMGN24 cpx indicate that EMGN24 was garnet bearing prior to hydration. Chlorite clusters surround aggregates of small opaque grains. Chlorite clusters are small (~1400 µm), but are abundant in contrast to samples that have fewer, larger chlorite clusters (e.g., EMGN9). Chlorite and amphibole frequently grow within and surround opx. Cpx was not observed in thin section, but found in mineral separates. Dense intergrowth clusters of chlorite and amphibole may be a hydration product of Al-rich cpx. Serpentine rims chlorite clusters and forms slender crystals growing within and around pyroxenes and olivines. Carbonate is present as a long vein that cuts across the thin section. Serpentine is ~15%, chlorite is ~10%, amphibole ~5%, clinohumite is <1% by mode.

**Location:** 35.9533° N, 109.0227° W

#### **EMGN27**

**Mineralogy:** Ol + opx + serpentine + amphibole + carbonate + chlorite + cpx + opaques

**Petrography:** Hydrated equigranular harzburgite. Olivine displays [010] cleavage, made visible by thin fractures filled with serpentine. Serpentine also forms irregular-shaped clumps that grow within olivines. Chlorite thinly rims opaques (tens of microns thick). Prismatic amphibole can rarely be found replacing

pyroxenes. Three carbonate grains in this section contain inclusions of silicate minerals, likely opx. Serpentine ~ 15% by mode, chlorite ~ 1%, amphibole ~1% by mode.

**Location:** 35.9533° N, 109.0227° W

#### **EMGN29**

**Mineralogy:** Ol + opx + cpx + chlorite + amphibole + opaque + serpentine

**Petrography:** Lherzolite, modal olivine abundance (~50%) is similar to modal pyroxene abundance (~50%). EMGN29 has very little textural overprinting by hydrous mineral growth. Olivines have curved boundaries with pyroxenes, but with other olivines they have straight boundaries with 120° triple junctions. Olivines and pyroxenes may display undulose extinction. Finer sized cpx, amphibole and chlorite (~ 50 µm) are found at some junctions and grain boundaries. Cpx has two populations, larger (~1500 µm) grains similar in size to olivine and opx in the section, and small (~500 µm) grains that are found in the interstices of larger grains. Cpx (of both sizes) is frequently cloudy with inclusions. Chlorite surrounds opaque grains. Serpentine fills fractures in olivine. Serpentine, amphibole and chlorite make up ~ 1% of the sample by mode.

**Location:** 35.9533° N, 109.0227° W

#### **EMGN37**

**No thin section.**

179 **Location:** 35.9533° N, 109.0227° W

180

181 **N16-GN**

182 **Mineralogy:** Ol + Al-spinel + cpx + opx + serpentine

183 **Petrology:** Equigranular spinel lherzolite. Olivines and pyroxenes show minor

184 undulose extinction. Sample is close to textural equilibrium, containing many 120°

185 triple junctions. Hydrous minerals are limited to grain boundaries and fractures.

186 Serpentine is ~5% by mode.

187 **Previous studies also using this sample:** Smith and Levy, 1976; Roden et al.,

188 1990; Roden and Shimizu, 1993; Smith, 2013; Behr and Smith, 2016.

189 **Location:** 35.9533° N, 109.0227° W

190

191 **N17-GN**

192 **Mineralogy:** Ol + opx + cpx + chlorite + serpentine + amphibole + opaque

193 **Petrology:** Equigranular lherzolite-harzburgite. Thin chlorite rims surround

194 opaques. Larger Al-spinel grains have opaque rims with semi-transparent cores.

195 Serpentine fills fractures and grain boundaries. Amphibole grows in grain

196 boundaries around pyroxenes. Olivines and pyroxenes display kinking and undulose

197 extinction. Chlorite ~1%, Amphibole <1%, serpentine <1% by mode.

198 **Previous studies also using this sample:** Smith and Levy, 1976; Smith, 1979;

199 Roden and Shimizu, 1993; Smith, 2013.

200 **Location:** 35.9533° N, 109.0227° W

201

202    **N23-GN**

203    **Mineralogy:** Ol + opx + chlorite + cpx + amphibole + clinohumite + opaque

204    **Petrography:** Hydrated lherzolite. Chlorite forms round clusters that are rimmed  
205    with amphibole, but contain no opaques. The clusters make up ~10% of the sample.  
206    Roden et al. (1990) interpreted N23-GN to be a garnet peridotite prior to hydration,  
207    based on HREE depletions in cpx and the similarity of the shape of the chlorite  
208    clusters to garnets. Cpx is noticeably exsolved and is often rimmed with fine grained  
209    amphibole and chlorite. Chlorite ~ 25%, amphibole ~ 10% by mode.

210    **Previous studies also using this sample:** Smith, 1979; Roden et al., 1990; Roden  
211    and Shimizu, 1993; Smith, 2013.

212    **Location:** 35.9533° N, 109.0227° W

213

214    **N53-GN**

215    **Mineralogy:** Ol + opx + cpx + Al-spinel + serp

216    **Petrology:** Equigranular spinel lherzolite. Sample is close to textural equilibrium,  
217    containing many 120° triple junctions. In parts of the thin section, linear fractures  
218    containing fine grained, unidentified material cut across the sample. Serpentine fills  
219    thin cracks and grain boundaries, making up <1% by mode.

220    **Previous studies also using this sample:** Smith and Levy, 1976; Roden and  
221    Shimizu, 1993; Smith, 2013.

222    **Location:** 35.9533° N, 109.0227° W

223

224    **N55-GN**

225 **Mineralogy:** Ol + opx + cpx + sp + amph + serpentine + gar + serp  
226 **Petrology:** Spinel-garnet lherzolite. Garnet rims spinel in irregularly thick rims. In  
227 places, clusters of neoblastic olivine, amphibole and chlorite occur at grain  
228 junctions. Amphibole grows around cpx, forming thin or partial rims of nucleating  
229 amphibole grains. Amphibole ~1% by mode.

230 **Previous studies also using this sample:** Smith and Levy, 1976; Smith, 1979.

231 **Location:** 35.9533° N, 109.0227° W

232

#### 233 **N61-GN**

234 **Mineralogy:** Ol + opx + cpx + Al-spinel +amph

235 **Petrology:** Equigranular spinel lherzolite. Similar to N53-GN, fractures cut across  
236 the sample containing unidentified, fine grained material. Unlike N53-GN, fine  
237 grained material can also be found at grain boundaries throughout the sample.  
238 Amphibole appears in a small cluster. Amphibole <1% by mode.

239 **Previous studies also using this sample:** Smith and Levy, 1976; Roden et al.,  
240 1990; Roden and Shimizu, 1993.

241 **Location:** 35.9533° N, 109.0227° W

242

#### 243 **N106-GN**

244 **Mineralogy:** Ol + opx + cpx + chlorite + amphibole + opaques

245 **Petrology:** Hydrated lherzolite. Chlorite surrounds opaque grains. Fine grained  
246 amphibole surrounds cpx grains. Cpx is cloudy with inclusions. Cpx and opx are both  
247 intergrown with amphibole in places. One olivine porphyroblast is unusually long,

almost 1cm in length. Garnet rims around spinel were reported in an informal description, but could not be confirmed (personal communication, D. Smith).

Chlorite ~1%, amphibole ~10% by mode.

**Location:** 35.9533° N, 109.0227° W

#### **N126-GN**

**Mineralogy:** Ol + opx + cpx + Al-spinel + serpentine

**Petrology:** Spinel lherzolite. Sample is close to textural equilibrium, containing many 120° triple junctions. Olivines display undulose extinction. Evidence of hydration is limited to serpentine that fills thin fractures and grain boundaries.

Serpentine <1% by mode. The rock has distinctive intergrowths of spinel and pyroxene, interpreted by Smith (1977) as products of garnet-olivine reaction.

**Previous studies also using this sample:** Smith, 1977.

**Location:** 35.9533° N, 109.0227° W

#### **N178-GN**

**Mineralogy:** Ol + opx + cpx + chlorite + Cr-spinel + phlogopite (trace)

**Petrology:** Deformed harzburgite. N178-GN is strongly foliated. Kinking of opx and olivine is found in almost all grains. Spinel is absent. Chlorite is present, but does not form clusters. Chlorite ~5% by mode.

**Previous studies also using this sample:** Smith, 2010; Smith, 2013.

**Location:** 35.9533° N, 109.0227° W

**References**

- Behr, W.M., and Smith, D., 2016, Geochemistry, Geophysics, Geosystems: Geochemistry Geophysics Geosystems, v. 17, p. 2825–2834.
- McGetchin, T.R., and Silver, L.T., 1972, A crustal-upper-mantle model for the Colorado Plateau based on observations of crystalline rock fragments in the Moses Rock Dike: Journal of Geophysical Research, v. 77, no. 35, p. 7022–7037.
- McGetchin, T.R., and Silver, L.T., 1970, Compositional relations in minerals from kimberlite and related rocks in the Moses Rock dike, San Juan County, Utah: American Mineralogist, v. 55, no. 1618, p. 1738–1771.
- Roden, M., and Shimizu, N., 1993, Ion microprobe analyses bearing on the composition of the upper mantle beneath the Basin and Range and Colorado Plateau provinces: Journal of Geological Research, v. 98, no. 93, p. 14091–14108.
- Roden, M., Smith, D., and Murthy, V., 1990, Chemical constraints on lithosphere composition and evolution beneath the Colorado Plateau: Journal of Geophysical Research, v. 95, no. 89, p. 2811–2831.
- Smith, D., 2010, Antigorite Peridotite, Metaserpentinite, and other Inclusions within Diatremes on the Colorado Plateau, SW USA: Implications for the Mantle Wedge during Low-angle Subduction: Journal of Petrology, v. 51, no. 6, p. 1355–1379.
- Smith, D., 1979, Hydrous minerals and carbonates in peridotite inclusions from the

294 green knobs and bull park kimberlitic diatremes on the Colorado Plateau: The  
295 Mantle Sample: Inclusion in Kimberlites and Other Volcanics, v. 16, p. 345–356.  
296 Smith, D., 2013, Olivine thermometry and source constraints for mantle fragments  
297 in the Navajo Volcanic Field, Colorado Plateau, southwest United States:  
298 Implications for the mantle wedge: Geochemistry, Geophysics, Geosystems, v.  
299 14, no. 3, p. 693–711.  
300 Smith, D., 1977, The Origin and Interpretation of Spinel-Pyroxene Clusters in  
301 Peridotite: v. 85, no. 4, p. 476–482.  
302 Smith, D., and Levy, S., 1976, Petrology of the Green Knobs diatreme and  
303 implications for the upper mantle below the Colorado Plateau: Earth and  
304 Planetary Science Letters, v. 29, p. 107–125.

## 1    **Appendix 2**

### 2    **Samples and Analytical Methods**

3

#### 4    **Sample Selection:**

5            Peridotite xenoliths were collected from Green Knobs and Moses Rock in  
6    2014. The collected peridotite xenoliths varied in size, texture, mineralogy and  
7    hydrous mineral abundance. We selected ~45 xenoliths that spanned this observed  
8    variability for further analysis. Additional samples that had been previously  
9    characterized were selected from the collection of Dr. Douglas Smith at The  
10   University of Texas at Austin. A small portion of each xenolith was crushed and 2-3  
11   clinopyroxenes from each sample were mounted and analyzed by Electron Probe  
12   MicroAnalyzer (EPMA) to survey mineral major element variations. Based on these  
13   preliminary analyses, a suite of ~25 xenoliths were chosen for further study that  
14   span the observed range of compositions and textures.

15

#### 16   **Whole Rock Major and Trace Element Analyses**

17            Analysis of major and trace elements in whole rock powders were performed  
18   at Washington State University GeoAnalytical Labs following the procedures of  
19   Johnson et al. (1999). For each sample, 5 to 10 grams of rock was powdered in a  
20   tungsten carbide (WC) swingmill at WSU. Whole rock major elements were  
21   determined via X-Ray Fluorescence (XRF), and trace element concentrations were  
22   determined via solution ICP-MS. Two powder duplicates, two grinding media

duplicates, and BHVO-2 were all analyzed to test reproducibility and constrain potential contamination of the grinding media.

Tungsten carbide (WC) is commonly used for grinding samples in preparation for geochemical analysis because WC does not contaminate major elements. However, Hickson and Juras (1986) have suggested that WC may contaminate high field strength elements (HFSE, e.g., Ta, Nb). To test for possible HFSE contamination, separate splits from two samples (EMGN2 and EMGN23) were ground in WC and in agate for comparison. Ta concentrations were higher in the WC-ground powders for both samples, but were close to the detection limit. We did not observe a systematic increase in Nb in the WC-prepared powders or any other systematic differences for elements above detection limits.

Replicates of XRF powder splits are reproducible to better than 1% for elements with abundances greater than 5 wt% (Si, Fe, Mg), varied less than 5% for elements with concentrations between 0.1 wt% and 5 wt% (Al, Cr, Mn, Ca, Na, Ni), and varied less than 10% for Ti (usually <0.1 wt%). Duplicate ICP-MS analyses varied within 5% for elements with abundances higher than 1ppm, and varied within 25% for concentrations less than 1 ppm. Analyzed replicates of BHVO-2 (See Table DR2) were within the published  $2\sigma$  compositional variation of the standard.

#### **Clinopyroxene Major Element Analyses**

Clinopyroxene major elements were analyzed on a JEOL JXA-8200 EPMA at the University of Texas at Austin. EPMA analyses used a 20 nA beam current, 15 kV accelerating voltage, and a 10  $\mu$ m defocussed beam. Count times were 30-40 s on

peak and 15-20 s off peak, with shorter count times for more abundant elements. Precision of repeated analysis on secondary standard NMNH Cr-Augite 164905 (see Table DR1) for a given element is inversely correlated with that element's concentration. Reproducibility for elements with concentrations greater than 1 wt. % was better than 5%, and better than 12% for elements with concentrations less than 1 wt. %. Averaged analyses of NMNH Cr Augite were within 5% of the standard composition, except for Mn (within 12%) (Jarosewich et al., 1980). However because Al was calibrated using the Cr-Augite standard, NMNH Kakanui Hornblende 143965 was used as a secondary standard for this element. Reproducibility for Al on the Kakanui Hornblende standard was better than 2%. Probe analyses of the same cpx grain show similar reproducibility to the Cr-Augite standard for all elements except Ti, which has significantly worse reproducibility (141%) due to extremely low Ti concentration (<1000ppm) in most samples. Because Ti concentration by LA-ICP-MS has better reproducibility than the EPMA (1.5% on glass standards, 8% on grain duplicates) and because there is a 1:1 correlation between the EPMA and LA-ICP-MS datasets, we use Ti concentration data measured in clinopyroxene by LA-ICP-MS in place of data measured by EPMA. Clinopyroxenes in samples with chlorite growth typically display Al<sub>2</sub>O<sub>3</sub> depletion in the edges of grains. Data presented in Table DR1 are average analyses of 4-5 cpx grain interiors from each sample. Previously published EPMA clinopyroxene analyses for two of the samples are available in Table DR1 for comparison with our results.

## **Clinopyroxene Trace Element Analyses**

Clinopyroxene trace elements concentrations were measured via LA-ICP-MS using a New Wave UP-193FX laser system coupled to an Agilent 7500Ce quadrupole instrument at the University of Texas at Austin. The maximum spot size of 150  $\mu\text{m}$  was used to achieve maximum signal intensity due to the low concentrations present for many trace elements. All spots were pre-ablated before analysis. Each individual laser ablation analysis consisted of a 40 sec gas blank followed by 60 sec laser dwell time. The laser wavelength was 193nm and had a 10 Hz firing rate. Ablated material was transported with a He sweep gas flow rate of 700 mL per min and Ar carrier gas flow rate of 650 mL per min. NIST 612 was used as the primary standard. Repeat analyses of the BCR-2G secondary standard are reproducible within 5% of the published composition, except for Pb, Hf, Gd, and Y which were reproduced within 8% of the published composition. Interior-to-edge variability is found in most Group T clinopyroxenes and in some Group D clinopyroxenes. In these samples, Sr and LREE concentration increases towards the edge of the grain. Typically, interiors of 4-5 clinopyroxene grains were analyzed per sample, using the same spots analyzed previously by EPMA. Data reported in Table DR1 are the average composition of these multiple grain interior analyses. In samples that do not contain interior-to-edge variation, clinopyroxene trace element concentrations from multiple grains are usually within 10%. In samples that do contain interior-to-edge variation, cpx trace element concentrations between multiple grains vary within the range of measured interior-to-edge variability.

## **Sm-Nd Isotope Analyses**

92

93           Sm-Nd isotopes were measured on ~50 to ~200 mg of hand-picked cpx  
94 separates. Before digestion, the separates were either leached for 20 min in 2.5 N  
95 HCl at 60°C (soft leach) or for 1 hour in 6 N HCl at 90°C (hard leach). Samples were  
96 spiked with a  $^{149}\text{Sm}$ - $^{150}\text{Nd}$  mixed spike. The dissolution and chemical extraction  
97 procedures followed the procedures of Connelly et al. (2006). Following sample  
98 dissolution in HF:HNO<sub>3</sub>, Nd and Sm were extracted via column chemistry using  
99 AG50W-X8 and HDEHP resins. Sm and Nd were loaded onto double Re filaments,  
100 and analyzed as metal ions on a Triton TIMS at the University of Texas at Austin. The  
101 full Nd procedural blank was less than 30 pg, and the full Sm procedural blank was  
102 less than 2.5 pg. The average  $^{143}\text{Nd}/^{144}\text{Nd}$  value obtained at UT Austin for the AMES  
103 Nd standard during the period of this study was  $0.512088 \pm 0.000013$  ( $2\sigma$ ), slightly  
104 higher than the value of Scher and Delaney (2010),  $0.512069 \pm 0.000014$ . Similarly,  
105 the average composition of rock standard USGS BCR-2 measured during the same  
106 period was  $0.512656 \pm 0.000014$  ( $2\sigma$ ), slightly higher than the published composition  
107 of  $0.512633 \pm 0.000007$  ( $2\sigma$ ) (Raczek et al., 2001). In order to eliminate inter-  
108 laboratory bias, the data have been adjusted by 0.000002, correcting to the  
109 published compositions of AMES and BCR-2 standards.

110           Clinopyroxene grains from hydrated xenolith assemblages usually contain  
111 fractures filled with hydrous minerals (e.g., chlorite, serpentine, amphibole) and  
112 often contains oxide and silicate inclusions. Most clinopyroxenes have a cloudy  
113 appearance and are not optically clear. As a result, completely optically pure  
114 separates could not be obtained. In addition, Group T cpx display LREE enriched

115 rims, as observed in LA-ICP-MS core-to-rim profiles. This zoning may have affected  
116 Nd isotopes and Sm/Nd ratios in the rims relative to the cores. To constrain the  
117 influence of hydrous phases and LREE enrichment in the rims we analyzed duplicate  
118 cpx splits from three samples using two different leaching procedures. Nd isotope  
119 analyses using the two different procedures were reproducible within error for two  
120 samples. Nd isotopes for a third sample were higher by 2.89 epsilon units in the  
121 hard leach, but this split also had higher measured Sm/Nd, consistent with  
122 increased removal of the LREE-enriched rim component through the hard leach.  
123 Measured Sm/Nd compositions were variable in the different splits, but were not  
124 consistently higher in the hard leached splits relative to the soft leached splits.  
125 Variability in measured Sm/Nd and Nd isotope composition between different  
126 mineral splits from the same sample likely reflects in part differing abundances of  
127 inclusions in the separate splits. Despite this variability, isochron ages calculated  
128 from the Group D soft leach and hard leach samples yield similar ages (soft leach:  
129  $1.45 \pm 0.04$  Ga,  $n=5$ ; hard leach:  $1.39 \pm 0.2$  Ga,  $n=3$ ). The Sm-Nd data are listed in  
130 Table DR4 for both soft and hard leach analyses. In Figure 3 and for calculation of  
131 the Group D isochron, we average the hard and soft leach data for each sample. The  
132 reported error is either the internal standard error of the measurement (2 SE) or  
133 two times the external standard error of the duplicates, whichever is greater.

#### 135 **Rhenium-Osmium Isotope Analyses**

Re and Os were isolated from whole rock powders following the method of Byerly and Lassiter (2012). Most Re-Os digestions were performed at UT Austin. The Jackson School of Geosciences building at UT Austin was closed for renovations during the summer of 2015. A subset of samples was digested at the University of Bonn, Germany during the building closure. The digestion procedure at University of Bonn is similar to the procedure at UT Austin, except solvent extraction used chloroform instead of carbon tetrachloride. Rind-free chips of the xenoliths were cut with a water saw, and saw marks were removed with SiC sand paper. Chips were then ground to a fine powder in an alumina ball mill. Small amounts (~1.5-3 g) of powder were prepared in order to preserve as much of the xenoliths as possible for further analyses. As a result, intra-sample heterogeneity may not be fully homogenized by the small powder splits that were prepared. Separate chips were powdered for digestion at UT Austin and the University of Bonn. Approximately 1.5 g of whole rock powders were put in quartz pressure vessels, spiked with a  $^{185}\text{Re}$ - $^{190}\text{Os}$  mixed spike and then reacted in reverse aqua regia in a *Anton-Paar* High-Pressure Asher (at 105 bar and 300°C). Osmium was extracted from the aqua regia using  $\text{CCl}_4$ , and then back-extracted into HBr. The Os was purified further using microdistillation (Birck et al., 1997). Rhenium was separated from the aqua regia using anion exchange columns. Finally, Os was loaded onto Pt filaments, as described in Chatterjee and Lassiter (2015), and analyzed in negative ion mode (N-TIMS) as  $\text{OsO}_3^-$  on the Triton TIMS at UT Austin. Re was analyzed via solution MC-ICP-MS using the Micromass Isoprobe at UT-Austin, and on a Thermo Scientific Element XR SF-ICP-MS at University of Bonn. Total procedural Os blanks were <1pg

at UT Austin and <2 pg at the University of Bonn. Re blanks were <5 pg. The average  $^{187}\text{Os}/^{188}\text{Os}$  ratio of the Johnson-Matthey Os standard run during the period of this study was  $0.113832 \pm 0.000006$ .

Osmium isotopes and Os concentration in replicate analyses (powders from separate xenolith chips) show greater variability than can be accounted for by analytical error. This may reflect variable sampling of different sulfide populations in the different xenolith splits and thus reflects intra-sample heterogeneity. From petrographic observation, many peridotite xenoliths from Green Knobs and Moses Rock contain abundant sulfides both as inclusions in silicate phases and along grain boundaries. In addition, EDS imaging of thin sections revealed the occasional presence of rare PGE alloy and PGE-sulfide grains, including a Ru-Rh-Ir alloy grain and PtS. Several analyses produced high Re concentrations (not quantitatively determined due to underspiking), which may have resulted from inclusion of Re-rich “nuggets”. Despite the intra-sample heterogeneity, whole rock  $\text{Al}_2\text{O}_3$  and  $^{187}\text{Os}/^{188}\text{Os}$  are well correlated. For Figure 2, we report the average of replicate analyses. The reported error is either the internal standard error of the measurement (2 SE) or two times the external standard error of the replicates, whichever is greater. The data for all Re-Os replicate analyses can be found in Table DR3.

## References

Birck, J.L., Barman, M.R., and Capmas, F., 1997, Re-Os Isotopic Measurements at the

183 Femtomole Level in Natural Samples: v. 20, p. 19–27.

184 Byerly, B.L., and Lassiter, J.C., 2012, Evidence from mantle xenoliths for lithosphere  
185 removal beneath the central Rio Grande Rift: *Earth and Planetary Science*  
186 *Letters*, v. 355–356, p. 82–93, doi: 10.1016/j.epsl.2012.08.034.

187 Chatterjee, R., and Lassiter, J.C., 2015, High precision Os isotopic measurement using  
188 N-TIMS: Quantification of various sources of error in  $^{186}\text{Os}/^{188}\text{Os}$   
189 measurements: *Chemical Geology*, v. 396, p. 112–123, doi:  
190 10.1016/j.chemgeo.2014.12.014.

191 Connelly, J.N., Ulfbeck, D.G., Thrane, K., Bizzarro, M., and Housh, T., 2006, A method  
192 for purifying Lu and Hf for analyses by MC-ICP-MS using TODGA resin:  
193 *Chemical Geology*, v. 233, no. 1–2, p. 126–136, doi:  
194 10.1016/j.chemgeo.2006.02.020.

195 Hickson, C.J., and Juras, S.J., 1986, Sample contamination by grinding.: *Canadian*  
196 *Mineralogist*, v. 24, no. 3, p. 585–589.

197 Johnson, D.M., Hooper, P.R., and Conrey, R.M., 1999, XRF Analysis of Rocks and  
198 Minerals for Major and Trace Elements on a Single Low Dilution Li-tetraborate  
199 Fused Bead: *Advances in X-Ray Analysis*, v. 41, p. 843–867.

200 Raczek, I., Jochum, K.P., and Hofmann, A.W., 2001, Neodymium and Strontium  
201 Isotope Data for USGS Reference GSP-1 , GSP-2 and Eight MPI-DING Reference  
202 Glasses: *Geostandards Newsletterthe Journal of Geostandards and Geoanalysis*,  
203 v. 27, no. 2, p. 173–179, doi: 10.1111/j.1751-908X.2003.tb00644.x.

204 Scher, H.D., and Delaney, M.L., 2010, Breaking the glass ceiling for high resolution Nd  
205 isotope records in early Cenozoic paleoceanography: *Chemical Geology*, v. 269,

206 no. 3–4, p. 329–338, doi: 10.1016/j.chemgeo.2009.10.007.  
207 Smith, D., 2010, Antigorite Peridotite, Metaserpentinite, and other Inclusions within  
208 Diatremes on the Colorado Plateau, SW USA: Implications for the Mantle Wedge  
209 during Low-angle Subduction: *Journal of Petrology*, v. 51, no. 6, p. 1355–1379,  
210 doi: 10.1093/petrology/egq022.  
211

# 1 Appendix 3

2

## 3 Supplementary Figures

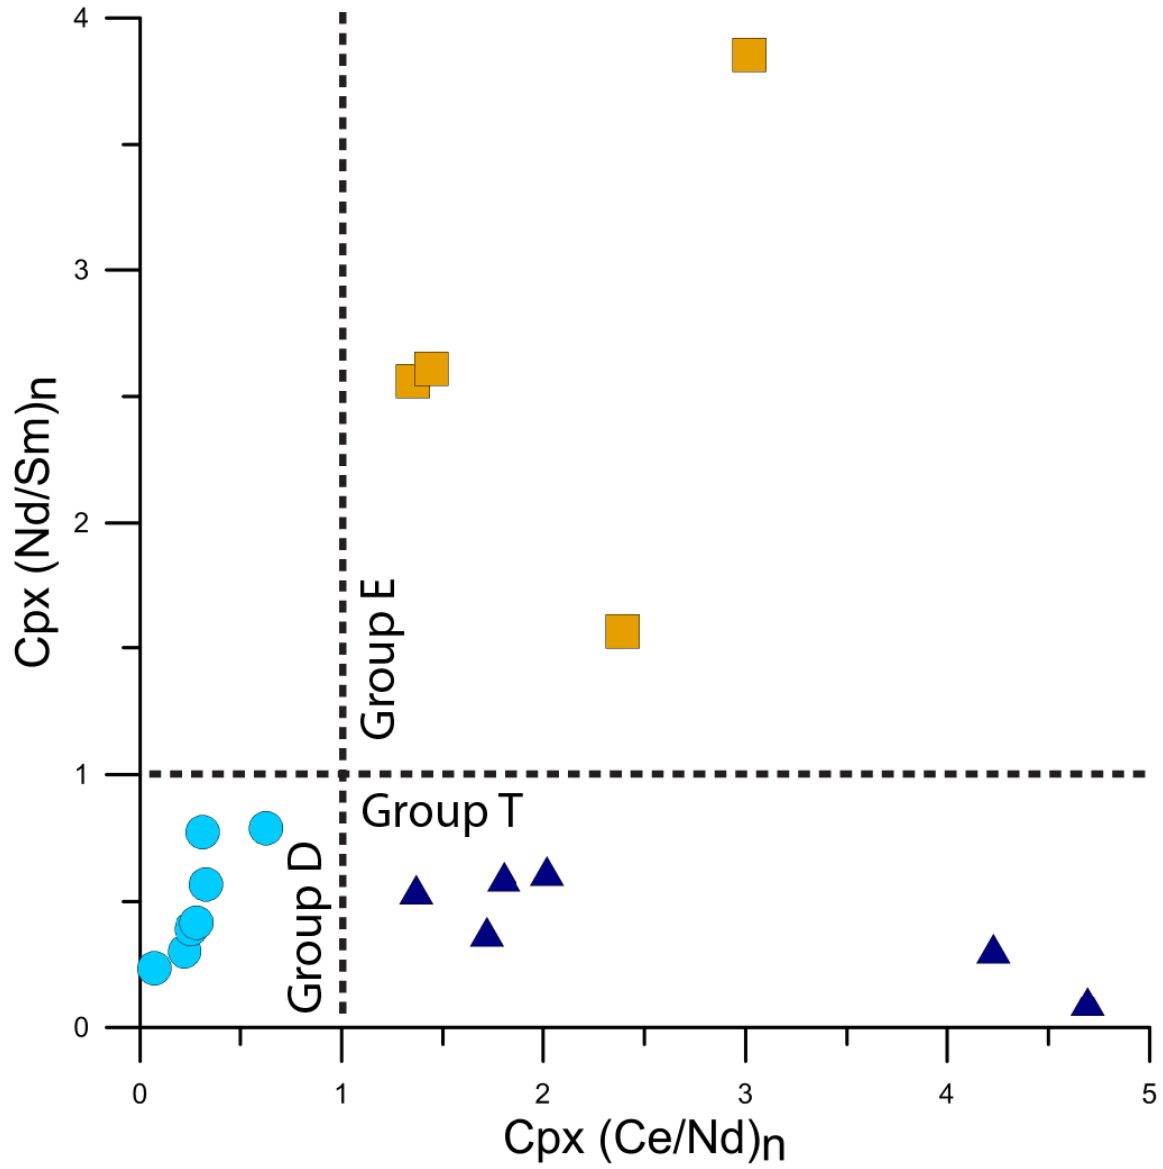

4

5 Figure DR1: Groups are defined based on the slope of their REE patterns around Nd.

6 These slopes can be quantified using the ratio of lanthanides with similar

7 incompatibility to Nd. See Figures DR2-4 for individual patterns.

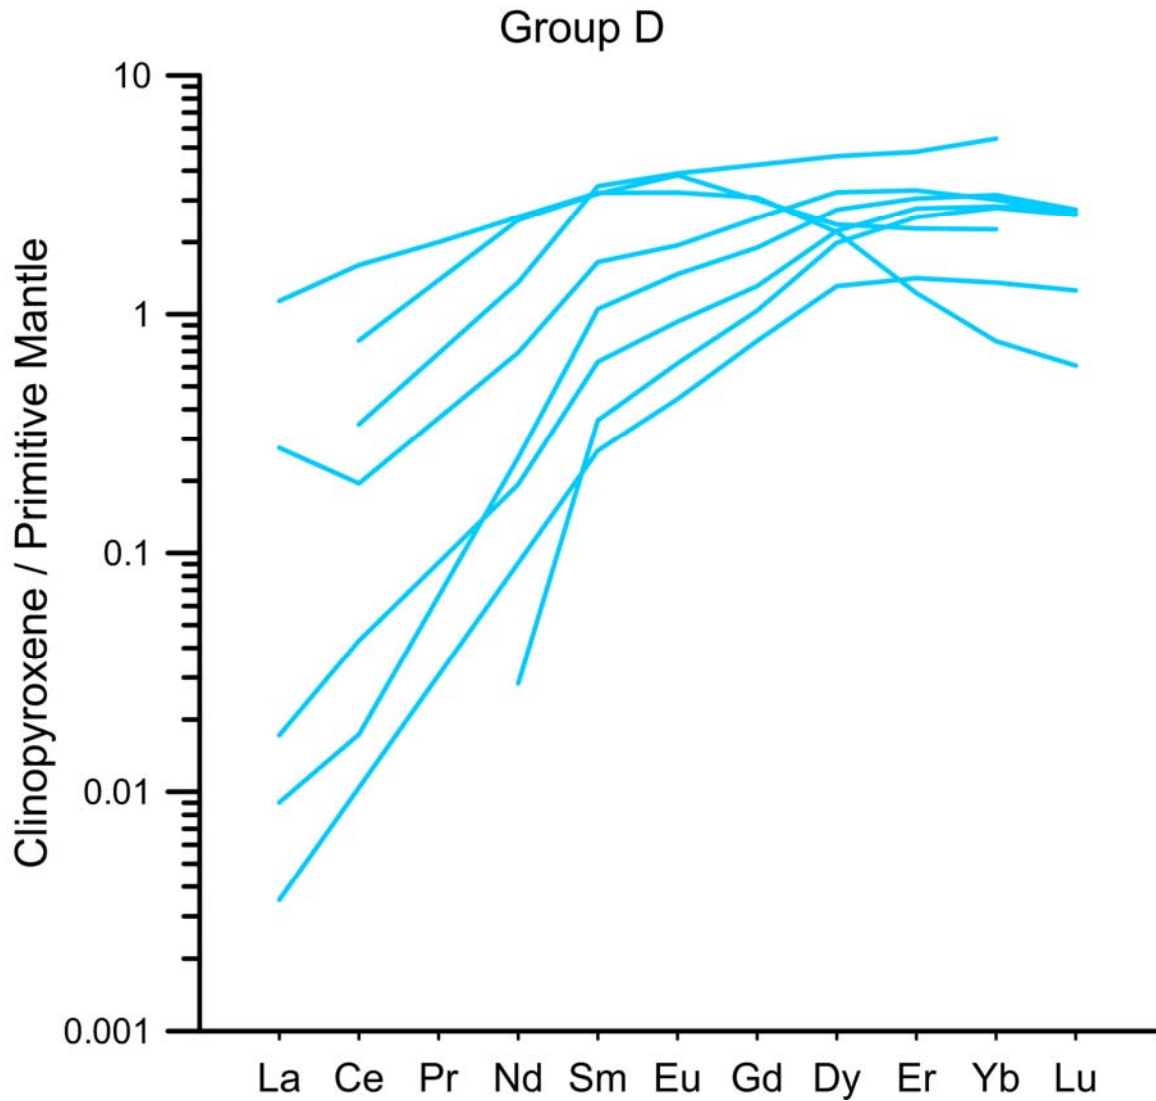

Figure DR2: Rare earth elements in clinopyroxene normalized to primitive mantle (McDonough and Sun, 1995). Group D samples generally display no LREE enrichment, although La is occasionally enriched.

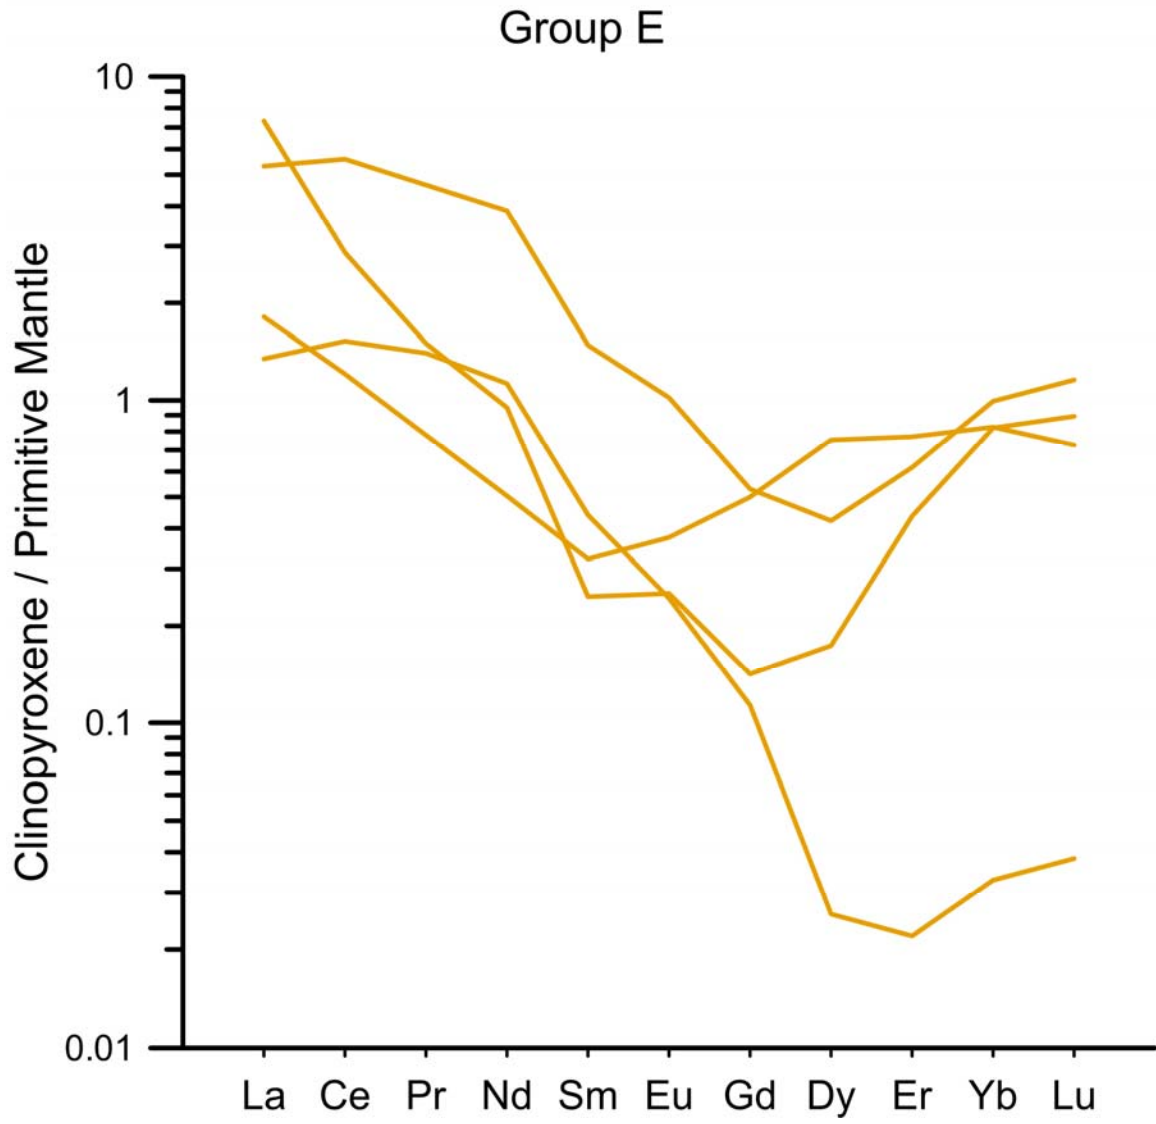

12

13 Figure DR3: Rare earth elements in clinopyroxene normalized to primitive mantle

14 (McDonough and Sun, 1995). Group E samples have significant LREE enrichment

15 that certainly affects Nd concentrations.

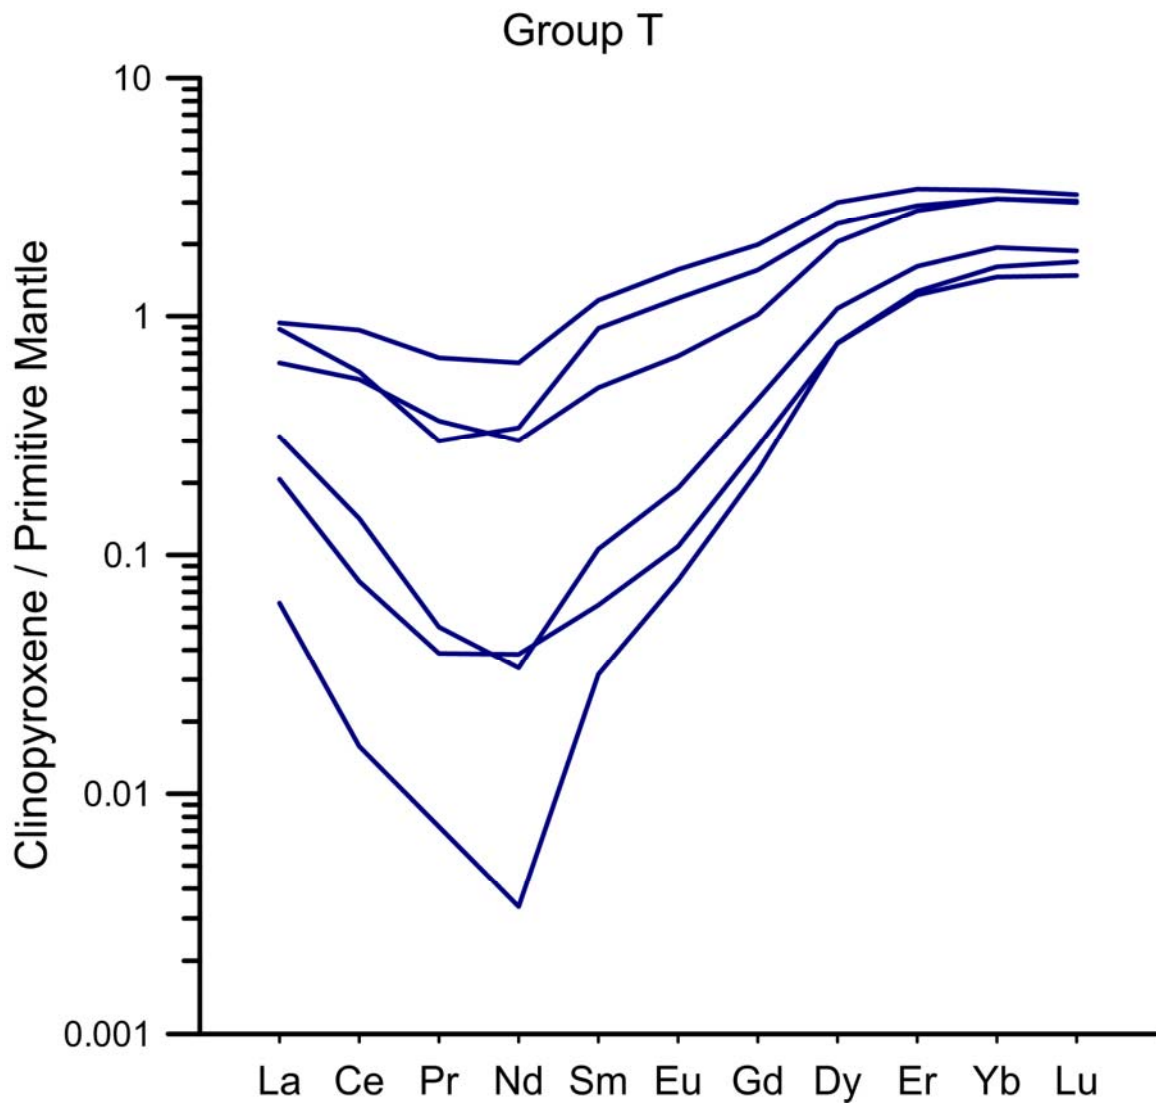

17

18 Figure DR4: Rare earth elements in clinopyroxene normalized to primitive mantle  
 19 (McDonough and Sun, 1995). Group T samples have less LREE enrichment than the  
 20 Group E samples. However, this LREE enrichment may still affect Nd concentrations.

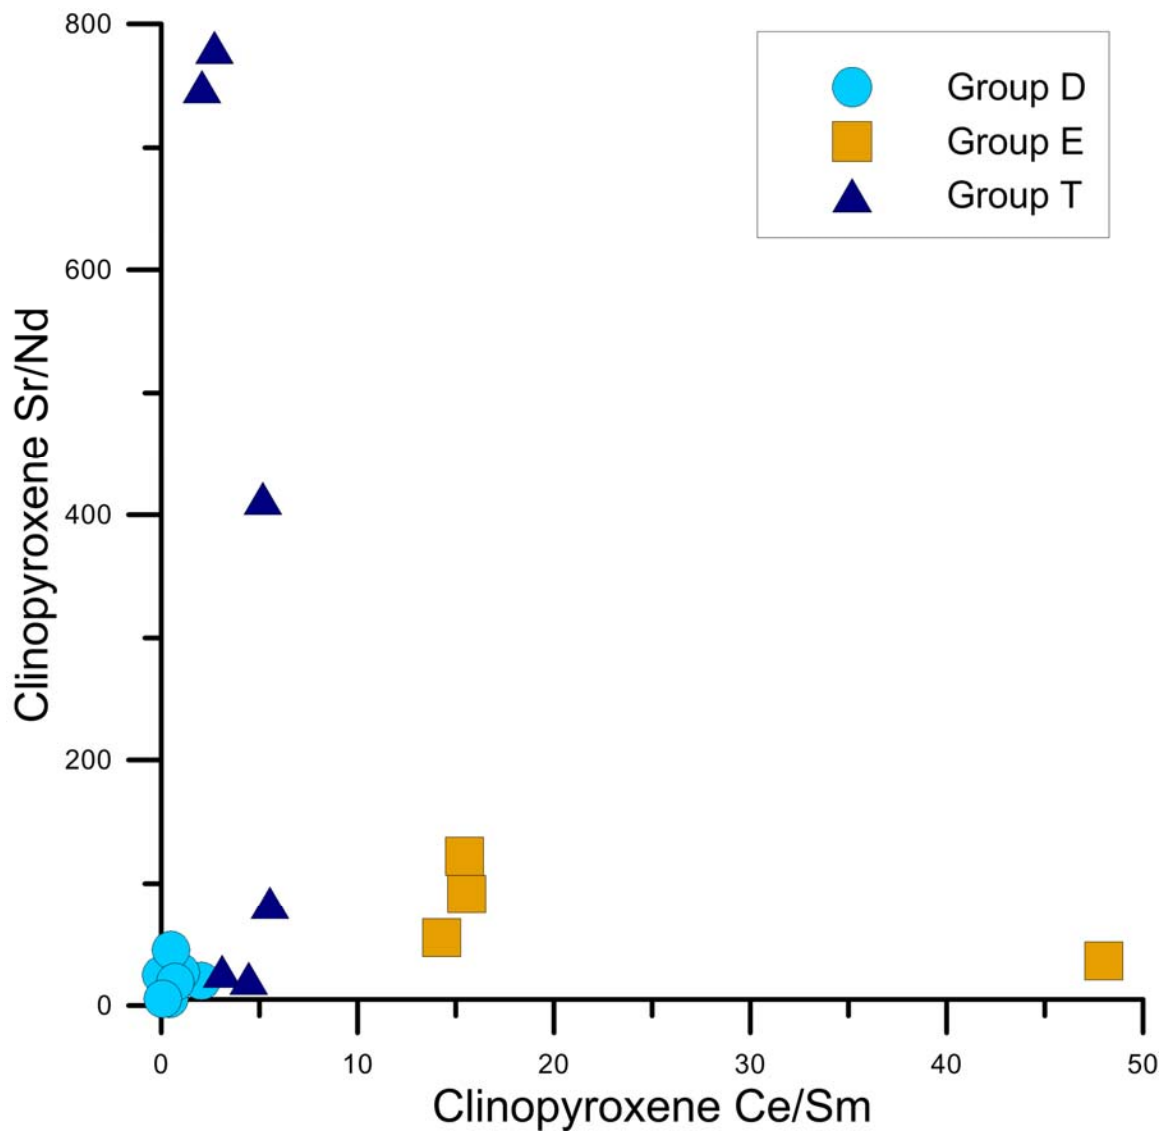

Fig DR5. Ce/Sm in clinopyroxene versus Sr/Nd in clinopyroxene. Group D samples tend to have low Sr/Nd and Ce/Sm. Group E samples tend to have moderately high Sr/Nd and are LREE enriched. The Group T samples have moderate LREE enrichment and can have extremely high Sr/Nd.

Table DR1: Clinopyroxene major and trace elements

|                                | MR-ATG-13 |            | N106-GN |            | N61-GN     |            | EMGN24  |            | N16-GN     |            | N126-GN |            | N23-GN     |            |
|--------------------------------|-----------|------------|---------|------------|------------|------------|---------|------------|------------|------------|---------|------------|------------|------------|
|                                | Average   | 2 $\sigma$ | Average | 2 $\sigma$ | Average    | 2 $\sigma$ | Average | 2 $\sigma$ | Average    | 2 $\sigma$ | Average | 2 $\sigma$ | Average    | 2 $\sigma$ |
|                                | Group D   |            | Group D |            | Group D    |            | Group D |            | Group D    |            | Group D |            | Group D    |            |
|                                |           |            |         |            | R&S (1993) |            |         |            | R&S (1993) |            |         |            | R&S (1993) |            |
|                                | n = 5     |            | n = 8   |            |            |            | n = 5   |            |            |            | n = 7   |            |            |            |
| SiO <sub>2</sub>               | 52.20     | (0.06)     | 52.03   | (0.37)     | 52.80      |            | 53.25   | (0.57)     | 51.40      |            | 51.88   | (0.12)     | 54.10      |            |
| TiO <sub>2</sub>               | 0.15      | (0.02)     | 0.22    | (0.02)     | 0.32       |            | 0.48    | (0.04)     | 0.37       |            | 0.09    | (0.01)     | 0.33       |            |
| Al <sub>2</sub> O <sub>3</sub> | 5.52      | (0.06)     | 4.84    | (0.36)     | 5.68       |            | 5.54    | (0.63)     | 5.95       |            | 6.99    | (0.12)     | 3.67       |            |
| Cr <sub>2</sub> O <sub>3</sub> | 1.13      | (0.04)     | 0.68    | (0.04)     | 0.84       |            | 1.04    | (0.07)     | 0.71       |            | 1.05    | (0.04)     | 1.35       |            |
| FeO                            | 1.98      | (0.14)     | 1.89    | (0.11)     | 1.76       |            | 2.31    | (0.34)     | 2.86       |            | 2.21    | (0.14)     | 1.98       |            |
| MnO                            | 0.09      | (0.01)     | 0.06    | (0.01)     |            |            | 0.08    | (0.01)     |            |            | 0.11    | (0.01)     |            |            |
| MgO                            | 15.80     | (0.30)     | 16.60   | (0.30)     | 14.90      |            | 15.53   | (0.75)     | 15.10      |            | 15.16   | (0.15)     | 15.90      |            |
| CaO                            | 21.94     | (0.37)     | 22.20   | (0.26)     | 21.20      |            | 20.18   | (0.92)     | 22.10      |            | 21.44   | (0.19)     | 21.00      |            |
| Na <sub>2</sub> O              | 1.33      | (0.04)     | 1.42    | (0.12)     | 2.03       |            | 2.04    | (0.19)     | 1.23       |            | 1.52    | (0.09)     | 2.28       |            |
| Total                          | 100.14    |            | 99.96   |            | 99.53      |            | 100.48  |            | 99.72      |            | 100.48  |            | 100.61     |            |
|                                |           |            |         |            |            |            |         |            |            |            |         |            |            |            |
|                                | n = 5     |            | n = 8   |            |            |            | n = 5   |            |            |            | n = 7   |            |            |            |
| La                             | 0.01      | (0.00)     | 0.18    | (0.05)     |            |            | 0.74    | (0.05)     |            |            | bd      |            |            |            |
| Ce                             | 0.07      | (0.01)     | 0.33    | (0.03)     | 1.30       |            | 2.69    | (0.13)     | 0.58       |            | bd      |            | 0.93       |            |
| Pr                             |           |            |         |            |            |            | 0.51    | (0.02)     |            |            |         |            |            |            |
| Nd                             | 0.24      | (0.02)     | 0.86    | (0.11)     | 3.10       |            | 3.20    | (0.14)     | 1.70       |            | 0.04    | (0.00)     | 2.10       |            |
| Sm                             | 0.26      | (0.02)     | 0.67    | (0.08)     | 1.30       |            | 1.31    | (0.05)     | 1.40       |            | 0.15    | (0.01)     | 1.20       |            |
| Eu                             | 0.14      | (0.01)     | 0.30    | (0.04)     | 0.59       |            | 0.50    | (0.03)     | 0.60       |            | 0.10    | (0.00)     | 0.41       |            |
| Gd                             | 0.71      | (0.05)     | 1.38    | (0.14)     |            |            | 1.68    | (0.07)     |            |            | 0.56    | (0.03)     |            |            |
| Dy                             | 1.50      | (0.07)     | 2.19    | (0.28)     | 1.60       |            | 1.49    | (0.07)     | 3.10       |            | 1.33    | (0.05)     | 0.52       |            |
| Er                             | 1.21      | (0.07)     | 1.45    | (0.21)     | 1.00       |            | 0.54    | (0.09)     | 2.10       |            | 1.12    | (0.04)     | 0.26       |            |
| Yb                             | 1.25      | (0.08)     | 1.33    | (0.23)     | 1.00       |            | 0.34    | (0.10)     | 2.40       |            | 1.23    | (0.03)     | 0.26       |            |
| Lu                             | 0.19      | (0.01)     | 0.18    | (0.03)     |            |            | 0.04    | (0.01)     |            |            | 0.18    | (0.00)     |            |            |
| Rb                             | 0.00      | (0.00)     | 0.01    | (0.02)     |            |            | 0.04    | (0.02)     |            |            | 0.08    | (0.07)     |            |            |
| Th                             | 0.00      | (0.00)     | 0.00    | (0.00)     |            |            | 0.01    | (0.01)     |            |            | 0.00    | (0.00)     |            |            |
| U                              | 0.00      | (0.00)     | 0.01    | (0.00)     |            |            | 0.00    | (0.00)     |            |            | 0.00    | (0.00)     |            |            |
| Nb                             | 0.01      | (0.00)     | 0.01    | (0.00)     |            |            | 0.08    | (0.02)     |            |            | 0.00    | (0.00)     |            |            |
| Ta                             | 0.00      | (0.00)     | 0.00    | (0.00)     |            |            | 0.02    | (0.00)     |            |            | 0.00    | (0.00)     |            |            |
| Pb                             | 0.02      | (0.03)     | 0.30    | (0.09)     |            |            | 0.31    | (0.19)     |            |            | 0.01    | (0.01)     |            |            |
| Sr                             | 5.64      | (1.84)     | 39.40   | (7.16)     | 85.00      |            | 65.69   | (8.62)     | 9.50       |            | 0.91    | (0.65)     | 36.00      |            |
| Zr                             | 1.65      | (0.08)     | 5.58    | (0.70)     | 6.60       |            | 19.37   | (0.86)     | 7.60       |            | 0.07    | (0.01)     | 8.70       |            |
| Hf                             | 0.11      | (0.01)     | 0.30    | (0.01)     |            |            | 0.78    | (0.04)     |            |            | 0.02    | (0.00)     |            |            |
| Y                              | 9.99      | (0.32)     | 11.75   | (1.62)     |            |            | 5.84    | (0.64)     |            |            | 9.10    | (0.18)     |            |            |
| V                              | 262       | (6.58)     | 229     | (10.11)    | 260        |            | 316     | (14.78)    | 280        |            | 240     | (5.85)     | 420        |            |

Reference: R&amp;S (1993): Roden and Shimizu, (1993); bd: below detection

Table DR1: Clinopyroxene major and trace elements

|                                | N53-GN<br>Average | 2σ     | EMGN12<br>Average | 2σ     | EMMR4<br>Average | 2σ     | N55-GN<br>Average | 2σ      | EMGN21<br>Average | 2σ | N178-GN<br>Average | 2σ      | EMGN27<br>Average | 2σ      |
|--------------------------------|-------------------|--------|-------------------|--------|------------------|--------|-------------------|---------|-------------------|----|--------------------|---------|-------------------|---------|
|                                | Group D           |        | Group D           |        | Group D          |        | Group E           |         | Group E           |    | Group E            |         | Group E           |         |
|                                | n = 5             |        | n = 7             |        | n = 1            |        | n = 3             |         | n = 1             |    | n = 7              |         | n = 6             |         |
| SiO <sub>2</sub>               | 52.25             | (1.41) | 51.75             | (1.21) | 53.48            |        | 53.53             | (0.53)  | 55.37             |    | 54.56              | (0.13)  | 54.91             | (3.22)  |
| TiO <sub>2</sub>               | 0.20              | (0.06) | 0.04              | (0.07) | 0.13             |        | 0.05              | (0.03)  | 0.01              |    | 0.01               | (0.01)  | 0.00              | (0.04)  |
| Al <sub>2</sub> O <sub>3</sub> | 6.69              | (0.89) | 5.20              | (0.33) | 5.36             |        | 2.41              | (0.84)  | 1.34              |    | 0.72               | (0.03)  | 1.56              | (1.01)  |
| Cr <sub>2</sub> O <sub>3</sub> | 0.90              | (0.09) | 1.00              | (0.16) | 1.33             |        | 0.50              | (0.02)  | 0.38              |    | 0.46               | (0.05)  | 0.98              | (1.05)  |
| FeO                            | 2.08              | (0.54) | 2.04              | (0.41) | 2.08             |        | 1.65              | (0.21)  | 1.26              |    | 1.60               | (0.07)  | 1.33              | (0.40)  |
| MnO                            | 0.08              | (0.05) | 0.08              | (0.04) | 0.13             |        | 0.08              | (0.02)  | 0.08              |    | 0.06               | (0.01)  | 0.05              | (0.06)  |
| MgO                            | 14.84             | (1.63) | 15.77             | (1.91) | 15.06            |        | 17.53             | (0.21)  | 17.58             |    | 17.60              | (0.06)  | 17.47             | (0.82)  |
| CaO                            | 21.27             | (1.50) | 22.42             | (2.10) | 22.11            |        | 23.38             | (1.08)  | 24.10             |    | 24.24              | (0.07)  | 23.91             | (0.72)  |
| Na <sub>2</sub> O              | 1.90              | (0.24) | 1.00              | (0.27) | 1.47             |        | 0.69              | (0.26)  | 0.57              |    | 0.58               | (0.06)  | 0.79              | (0.25)  |
| Total                          | 100.29            | (1.73) | 99.36             | (1.07) | 101.17           |        | 99.87             |         | 100.72            |    | 99.86              |         | 101.01            |         |
|                                | n = 6             |        | n = 8             |        | n = 2            |        | n = 3             |         | n = 1             |    | n = 7              |         | n = 9             |         |
| La                             | 0.01              | (0.00) | 0.01              | (0.01) | bd               |        | 1.17              | (0.22)  | 4.75              |    | 3.44               | (0.28)  | 0.87              | (0.27)  |
| Ce                             | 0.03              | (0.00) | 0.01              | (0.01) | bd               |        | 2.02              | (0.27)  | 4.80              |    | 9.36               | (0.30)  | 2.55              | (0.77)  |
| Pr                             | 0.02              | (0.00) | 0.00              |        | bd               |        |                   |         | 0.38              |    |                    |         | 0.36              | (0.11)  |
| Nd                             | 0.31              | (0.02) | bd                |        | bd               |        | 0.63              | (0.06)  | 1.19              |    | 4.84               | (0.51)  | 1.41              | (0.46)  |
| Sm                             | 0.43              | (0.05) | 0.02              | (0.00) | 0.11             | (0.02) | 0.13              | (0.03)  | 0.10              |    | 0.60               | (0.09)  | 0.18              | (0.06)  |
| Eu                             | 0.23              | (0.02) | 0.02              | (0.01) | 0.07             | (0.01) | 0.06              | (0.01)  | 0.04              |    | 0.16               | (0.02)  | 0.04              | (0.01)  |
| Gd                             | 1.03              | (0.08) | 0.15              | (0.04) | 0.42             | (0.04) | 0.27              | (0.07)  | 0.08              |    | 0.29               | (0.04)  | 0.06              | (0.03)  |
| Dy                             | 1.85              | (0.13) | 0.57              | (0.06) | 0.88             | (0.10) | 0.51              | (0.19)  | 0.12              |    | 0.28               | (0.02)  | 0.02              | (0.01)  |
| Er                             | 1.34              | (0.08) | 0.57              | (0.08) | 0.62             | (0.06) | 0.34              | (0.17)  | 0.19              |    | 0.27               | (0.02)  | 0.01              | (0.01)  |
| Yb                             | 1.40              | (0.13) | 0.70              | (0.06) | 0.60             | (0.12) | 0.36              | (0.17)  | 0.36              |    | 0.44               | (0.02)  | 0.01              | (0.01)  |
| Lu                             | 0.19              | (0.02) | 0.11              | (0.02) | 0.08             | (0.01) | 0.05              | (0.02)  | 0.06              |    | 0.08               | (0.00)  | 0.00              | (0.00)  |
| Rb                             | bd                |        | bd                |        | bd               |        | 0.13              | (0.12)  | 0.37              |    | 0.04               | (0.02)  | 0.38              | (0.74)  |
| Th                             | 0.00              | (0.00) | bd                |        | bd               |        | 0.04              | (0.01)  | 0.28              |    | 0.00               | (0.00)  | 0.02              | (0.03)  |
| U                              | bd                |        | bd                |        | 0.03             | (0.09) | 0.04              | (0.01)  | 0.05              |    | 0.01               | (0.00)  | 0.01              | (0.01)  |
| Nb                             | 0.01              | (0.00) | 0.00              | (0.00) | bd               |        | 0.49              | (0.28)  | 0.20              |    | 0.00               | (0.00)  | 0.02              | (0.04)  |
| Ta                             |                   |        |                   |        |                  |        | 0.00              | (0.00)  | 0.02              |    | bd                 |         |                   |         |
| Pb                             |                   |        |                   |        |                  |        | 0.54              | (0.22)  | 0.97              |    | 1.12               | (0.22)  |                   |         |
| Sr                             | 1.81              | (0.33) | 0.59              | (0.94) | 4.05             | (9.79) | 77.27             | (22.65) | 43.49             |    | 443.00             | (87.52) | 78.57             | (93.60) |
| Zr                             | 1.00              | (0.10) | bd                |        | 0.28             | (0.05) | 0.05              | (0.01)  | 0.28              |    | 1.39               | (0.13)  | 0.28              | (0.08)  |
| Hf                             | 0.12              | (0.02) | 0.00              | (0.00) | 0.05             | (0.01) | 0.02              | (0.01)  | 0.01              |    | 0.06               | (0.01)  | 0.01              | (0.01)  |
| Y                              | 11.30             | (0.81) | 4.39              | (0.45) | 5.44             | (0.42) | 2.94              | (1.35)  | 1.20              |    | 1.97               | (0.08)  | 0.08              | (0.05)  |
| V                              |                   |        |                   |        |                  |        | 199               | (41.49) | 171               |    | 141                | (4.77)  |                   |         |

Reference: R&amp;S (1993): Roden and Shimizu, (1993); bd: below detection

Table DR1: Clinopyroxene major and trace elements

|                                | EMMR25<br>Average | 2σ      | EMGN6<br>Average | 2σ     | EMGN29<br>Average | 2σ      | EMGN9<br>Average | 2σ      | EMGN2<br>Average | 2σ     | N17-GN<br>Average | NMNH Cr-Augite<br>Average | 2σ     |
|--------------------------------|-------------------|---------|------------------|--------|-------------------|---------|------------------|---------|------------------|--------|-------------------|---------------------------|--------|
|                                | Group T           |         | Group T          |        | Group T           |         | Group T          |         | Group T          |        | Group T           |                           |        |
|                                | n = 1             |         | n = 1            |        | n = 6             |         | n = 4            |         | n = 4            |        | n = 10            |                           | n = 36 |
| SiO <sub>2</sub>               | 56.06             |         | 53.25            |        | 51.75             | (1.02)  | 53.61            | (1.58)  | 52.87            | (0.45) | 51.85             | 50.66                     | (1.19) |
| TiO <sub>2</sub>               | 0.02              |         | 0.05             |        | 0.04              | (0.01)  | 0.11             | (0.05)  | 0.20             | (0.01) | 0.04              | 0.48                      | (0.08) |
| Al <sub>2</sub> O <sub>3</sub> | 0.37              |         | 4.92             |        | 5.44              | (0.83)  | 4.20             | (1.30)  | 5.62             | (0.47) | 5.07              | 8.06                      | (0.28) |
| Cr <sub>2</sub> O <sub>3</sub> | 0.06              |         | 1.06             |        | 1.11              | (0.23)  | 0.79             | (0.32)  | 0.76             | (0.03) | 1.06              | 0.87                      | (0.12) |
| FeO                            | 1.99              |         | 2.52             |        | 2.03              | (0.35)  | 1.65             | (0.19)  | 2.23             | (0.35) | 1.88              | 4.80                      | (0.32) |
| MnO                            | 0.12              |         | 0.09             |        | 0.08              | (0.02)  | 0.09             | (0.01)  | 0.09             | (0.02) | 0.08              | 0.13                      | (0.03) |
| MgO                            | 18.12             |         | 16.12            |        | 15.77             | (1.04)  | 15.86            | (0.64)  | 15.64            | (0.89) | 15.91             | 17.25                     | (0.40) |
| CaO                            | 24.23             |         | 21.93            |        | 22.33             | (0.99)  | 22.68            | (0.55)  | 21.14            | (1.52) | 23.08             | 17.28                     | (0.31) |
| Na <sub>2</sub> O              | 0.46              |         | 0.88             |        | 1.24              | (0.23)  | 1.40             | (0.24)  | 1.52             | (0.11) | 1.01              | 0.83                      | (0.16) |
| Total                          | 101.54            |         | 100.91           |        | 99.85             |         | 100.41           | (0.73)  | 100.07           |        | 100.00            | 100.38                    |        |
|                                | n = 2             |         | n = 2            |        | n = 6             |         | n = 5            |         | n = 4            |        | n = 10            |                           |        |
| La                             | 0.57              | (0.07)  | 0.20             | (0.01) | 0.03              | (0.09)  | 0.40             | (0.09)  | 0.61             | (0.03) | 0.04              | (0.01)                    |        |
| Ce                             | 0.98              | (0.14)  | 0.24             | (0.01) | 0.02              | (0.07)  | 0.89             | (0.16)  | 1.46             | (0.05) | 0.03              | (0.01)                    |        |
| Pr                             | 0.08              | (0.02)  | 0.01             | (0.00) | 0.00              | (0.00)  | 0.09             | (0.02)  | 0.17             | (0.00) |                   |                           |        |
| Nd                             | 0.43              | (0.20)  | 0.04             |        | bd                |         | 0.37             | (0.07)  | 0.79             | (0.03) | bd                |                           |        |
| Sm                             | 0.36              | (0.17)  | 0.04             |        | 0.02              | (0.01)  | 0.20             | (0.04)  | 0.47             | (0.03) | 0.01              | (0.00)                    |        |
| Eu                             | 0.18              | (0.05)  | 0.03             | (0.00) | 0.02              | (0.02)  | 0.10             | (0.02)  | 0.24             | (0.01) | 0.01              | (0.00)                    |        |
| Gd                             | 0.85              | (0.21)  | 0.24             | (0.03) | 0.18              | (0.03)  | 0.55             | (0.10)  | 1.08             | (0.05) | 0.12              | (0.01)                    |        |
| Dy                             | 1.65              | (0.48)  | 0.73             | (0.05) | 0.61              | (0.05)  | 1.37             | (0.18)  | 2.00             | (0.10) | 0.52              | (0.02)                    |        |
| Er                             | 1.28              | (0.35)  | 0.71             | (0.05) | 0.59              | (0.05)  | 1.21             | (0.14)  | 1.49             | (0.03) | 0.56              | (0.03)                    |        |
| Yb                             | 1.37              | (0.30)  | 0.85             | (0.01) | 0.70              | (0.04)  | 1.36             | (0.15)  | 1.47             | (0.08) | 0.71              | (0.04)                    |        |
| Lu                             | 0.20              | (0.03)  | 0.13             | (0.00) | 0.11              | (0.01)  | 0.21             | (0.03)  | 0.22             | (0.01) | 0.11              | (0.01)                    |        |
| Rb                             | bd                |         | 0.58             | (0.68) | 0.23              | (0.24)  | 0.11             | (0.10)  | 0.02             | (0.01) | bd                |                           |        |
| Th                             | bd                |         | 0.01             |        | bd                |         | 0.01             | (0.01)  | 0.03             | (0.00) | bd                |                           |        |
| U                              | 0.21              | (0.08)  | 0.00             | (0.00) | 0.01              | (0.01)  | 0.01             | (0.01)  | 0.01             | (0.00) | 0.01              | (0.00)                    |        |
| Nb                             | bd                |         | 0.57             | (0.00) | 0.00              | (0.00)  | 0.22             | (0.19)  | 0.30             | (0.05) | 0.004             | (0.001)                   |        |
| Ta                             |                   |         |                  |        | 0.00              | (0.00)  | 0.01             | (0.00)  | 0.02             | (0.00) | bd                |                           |        |
| Pb                             |                   |         |                  |        | 0.09              | (0.33)  | 0.11             | (0.18)  | 0.04             | (0.03) | 0.03              | (0.01)                    |        |
| Sr                             | 332.85            | (79.62) | 3.55             | (0.09) | 3.47              | (10.68) | 8.05             | (6.21)  | 22.71            | (0.69) | 3.15              | (1.27)                    |        |
| Zr                             | 0.32              | (0.03)  | 0.01             |        | 0.00              | (0.01)  | 1.29             | (0.19)  | 0.81             | (0.03) | bd                |                           |        |
| Hf                             | 0.04              | (0.01)  | 0.00             | (0.00) | bd                |         | 0.04             | (0.01)  | 0.11             | (0.01) | bd                |                           |        |
| Y                              | 10.36             | (2.73)  | 5.59             | (0.45) | 4.57              | (0.42)  | 9.36             | (1.11)  | 12.42            | (0.45) | 4.22              | (0.18)                    |        |
| V                              |                   |         |                  |        | 217               | (13.46) | 246              | (21.82) | 238              | (1.61) | 233               | (5.20)                    |        |

Reference: R&amp;S (1993): Roden and Shimizu, (1993); bd: below detection

Table DR1: Clinopyroxene major and trace elements

|                                | BCR-2G<br>Average | 2σ      | N17-GN*                                 | N23-GN*                        |
|--------------------------------|-------------------|---------|-----------------------------------------|--------------------------------|
|                                |                   |         | Group T<br><i>Smith and Levy (1976)</i> | Group D<br><i>Smith (1979)</i> |
| SiO <sub>2</sub>               |                   |         | 52.30                                   | 54.70                          |
| TiO <sub>2</sub>               |                   |         | 0.08                                    | 0.08                           |
| Al <sub>2</sub> O <sub>3</sub> |                   |         | 4.44                                    | 1.73                           |
| Cr <sub>2</sub> O <sub>3</sub> |                   |         | 0.85                                    | 1.24                           |
| FeO                            |                   |         | 2.16                                    | 2.03                           |
| MnO                            |                   |         | 0.10                                    | 0.06                           |
| MgO                            |                   |         | 17.30                                   | 16.80                          |
| CaO                            |                   |         | 21.90                                   | 22.60                          |
| Na <sub>2</sub> O              |                   |         | 0.91                                    | 1.19                           |
| Total                          |                   |         | 100.04                                  | 100.43                         |
| <b>n = 22</b>                  |                   |         |                                         |                                |
| La                             | 25.50             | (1.33)  |                                         |                                |
| Ce                             | 54.50             | (3.14)  |                                         |                                |
| Pr                             | 6.46              | (0.11)  |                                         |                                |
| Nd                             | 29.14             | (1.27)  |                                         |                                |
| Sm                             | 6.75              | (0.31)  |                                         |                                |
| Eu                             | 1.97              | (0.10)  |                                         |                                |
| Gd                             | 6.55              | (0.36)  |                                         |                                |
| Dy                             | 6.40              | (0.29)  |                                         |                                |
| Er                             | 3.61              | (0.15)  |                                         |                                |
| Yb                             | 3.42              | (0.18)  |                                         |                                |
| Lu                             | 0.51              | (0.03)  |                                         |                                |
| Rb                             | 47.90             | (1.98)  |                                         |                                |
| Th                             | 5.97              | (0.22)  |                                         |                                |
| U                              | 1.70              | (0.09)  |                                         |                                |
| Nb                             | 12.60             | (0.72)  |                                         |                                |
| Ta                             | 0.78              | (0.03)  |                                         |                                |
| Pb                             | 10.60             | (0.49)  |                                         |                                |
| Sr                             | 349.28            | (14.48) |                                         |                                |
| Zr                             | 178.11            | (7.66)  |                                         |                                |
| Hf                             | 4.61              | (0.17)  |                                         |                                |
| Y                              | 32.91             | (1.58)  |                                         |                                |
| V                              | 442               | (12.83) |                                         |                                |

Reference: R&amp;S (1993): Roden and Shimizu, (1993); bd: below detection

\*: These previously published analyses are included for easy comparison with the analyses used in this publication

Table DR2: Whole Rock major and trace elements

| Sample | MR-ATG-13 | N61-GN§* | EMGN24  | N16-GN§* | N126-GN | N23-GN* | EMGN12  | EMMR4   | N106-GN | N55-GN  | EMGN21  | N178-GN§ |        |
|--------|-----------|----------|---------|----------|---------|---------|---------|---------|---------|---------|---------|----------|--------|
|        | Group D   | Group D  | Group D | Group D  | Group D | Group D | Group D | Group D | Group D | Group E | Group E | Group E  |        |
|        |           |          |         |          |         |         |         |         |         |         |         |          | 2σ     |
|        |           |          |         |          |         |         |         |         |         |         |         | n = 3    |        |
| SiO2   | 43.82     | 44.68    | 43.45   | 40.62    | 45.00   | 42.64   | 43.25   | 44.04   | 45.21   | 43.19   | 43.37   | 43.22    | (0.92) |
| TiO2   | 0.02      | 0.09     | 0.10    | 0.03     | 0.02    | 0.07    | 0.01    | 0.02    | 0.06    | 0.01    | 0.00    | 0.00     | (0.00) |
| Al2O3  | 1.98      | 2.71     | 2.54    | 2.12     | 2.54    | 4.45    | 1.72    | 2.00    | 3.67    | 1.91    | 0.96    | 0.81     | (0.33) |
| Cr2O3  | 0.47      | 0.37     | 0.35    | 0.35     | 0.37    | 0.28    | 0.35    | 0.47    | 0.47    | 0.34    | 0.23    | 0.30     | (0.14) |
| FeO    | 7.65      | 8.12     | 7.24    | 10.15    | 7.79    | 7.37    | 7.18    | 6.71    | 7.71    | 8.18    | 7.15    | 7.04     | (0.22) |
| MnO    | 0.12      | 0.12     | 0.11    | 0.14     | 0.12    | 0.11    | 0.12    | 0.05    | 0.13    | 0.12    | 0.13    | 0.11     | (0.00) |
| MgO    | 40.27     | 39.88    | 35.59   | 42.99    | 39.11   | 36.69   | 40.21   | 32.52   | 37.80   | 42.37   | 42.33   | 44.89    | (1.93) |
| CaO    | 1.60      | 2.42     | 3.15    | 1.50     | 2.40    | 2.46    | 1.71    | 1.66    | 3.25    | 2.35    | 1.11    | 0.55     | (0.35) |
| Na2O   | 0.05      | 0.24     | 0.30    | 0.07     | 0.14    | 0.46    | 0.15    | 0.28    | 0.36    | 0.21    | 0.02    | 0.02     | (0.00) |
| K2O    | 0.01      | 0.00     | 0.04    | 0.01     | 0.00    | 0.07    | 0.01    | 0.09    | 0.01    | 0.02    | 0.01    | 0.00     | (0.00) |
| NiO    | 0.29      | 0.26     | 0.20    | 0.36     | 0.27    | 0.19    | 0.29    | 0.28    | 0.25    | 0.31    | 0.24    | 0.32     | (0.03) |
| P2O5   | 0.00      | 0.01     | 0.00    | 0.01     | 0.01    | 0.05    | 0.00    | 0.00    | 0.01    | 0.00    | 0.00    | 0.00     | (0.00) |
| LOI    | 3.77      | 0.90     | 6.08    | 1.64     | 2.42    | 5.12    | 4.77    | 11.40   | 1.15    | 1.21    | 4.38    | 2.97     | (0.24) |
| Total  | 100.05    | 99.81    | 99.15   | 100.00   | 100.18  | 99.96   | 99.76   | 99.52   | 100.07  | 100.25  | 99.92   | 100.24   |        |
| La     | 0.03      | 0.18     | 0.19    | 0.11     | 0.05    | 0.71    | 0.05    | 0.08    | 0.11    | 0.38    | 0.19    | 0.14     | (0.06) |
| Ce     | 0.06      | 0.58     | 0.44    | 0.22     | 0.11    | 0.84    | 0.10    | 0.13    | 0.16    | 0.56    | 0.32    | 0.35     | (0.16) |
| Pr     | 0.01      | 0.12     | 0.07    | 0.06     | 0.01    | 0.10    | 0.01    | 0.01    | 0.02    | 0.06    | 0.04    | 0.04     | (0.02) |
| Nd     | 0.04      | 0.63     | 0.36    | 0.18     | 0.04    | 0.42    | 0.04    | 0.04    | 0.15    | 0.16    | 0.16    | 0.17     | (0.09) |
| Sm     | 0.01      | 0.24     | 0.17    | 0.09     | 0.03    | 0.19    | 0.01    | 0.02    | 0.13    | 0.03    | 0.04    | 0.03     | (0.01) |
| Eu     | 0.01      | 0.10     | 0.07    | 0.04     | 0.01    | 0.08    | 0.00    | 0.01    | 0.06    | 0.01    | 0.01    | 0.01     | (0.01) |
| Gd     | 0.03      | 0.27     | 0.26    | 0.15     | 0.07    | 0.31    | 0.02    | 0.04    | 0.23    | 0.06    | 0.03    | 0.02     | (0.01) |
| Tb     | 0.01      | 0.05     | 0.05    | 0.03     | 0.02    | 0.07    | 0.01    | 0.01    | 0.05    | 0.02    | 0.00    | 0.00     | (0.00) |
| Dy     | 0.08      | 0.31     | 0.33    | 0.23     | 0.19    | 0.48    | 0.07    | 0.07    | 0.40    | 0.14    | 0.03    | 0.01     | (0.01) |
| Ho     | 0.02      | 0.07     | 0.07    | 0.06     | 0.05    | 0.11    | 0.02    | 0.02    | 0.09    | 0.04    | 0.01    | 0.00     | (0.00) |
| Er     | 0.07      | 0.17     | 0.19    | 0.17     | 0.15    | 0.33    | 0.07    | 0.06    | 0.29    | 0.12    | 0.03    | 0.02     | (0.01) |
| Tm     | 0.01      | 0.03     | 0.03    | 0.02     | 0.03    | 0.05    | 0.01    | 0.01    | 0.04    | 0.02    | 0.01    | 0.00     | (0.00) |
| Yb     | 0.11      | 0.17     | 0.19    | 0.16     | 0.18    | 0.30    | 0.09    | 0.06    | 0.30    | 0.14    | 0.04    | 0.02     | (0.01) |
| Lu     | 0.02      | 0.03     | 0.03    | 0.03     | 0.03    | 0.05    | 0.01    | 0.01    | 0.05    | 0.02    | 0.01    | 0.00     | (0.00) |
| Rb     | 0.09      | 0.34     | 0.10    | 0.65     | 0.11    | 0.30    | 0.17    | 0.73    | 0.11    | 0.30    | 0.14    | 0.23     | (0.04) |
| Pb     | 0.07      | 0.39     | 0.10    | 0.25     | 0.11    | 1.62    | 0.43    | 1.90    | 0.65    | 1.54    | 0.32    | 0.19     | (0.06) |
| Th     | 0.01      | 0.02     | 0.01    | 0.04     | 0.01    | 0.05    | 0.02    | 0.00    | 0.01    | 0.03    | 0.06    | 0.02     | (0.01) |
| U      | 0.20      | 0.01     | 0.01    | 0.01     | 0.00    | 0.03    | 0.00    | 3.99    | 0.01    | 0.03    | 0.01    | 0.01     | (0.00) |
| Nb     | 0.02      | 0.05     | 0.04    | 0.06     | 0.03    | 0.29    | 0.02    | 0.03    | 0.02    | 0.72    | 0.14    | 0.03     | (0.01) |
| Sr     | 34.14     | 19.97    | 22.93   | 7.96     | 11.60   | 117.00  | 13.82   | 50.93   | 16.60   | 26.75   | 11.91   | 14.71    | (6.41) |
| Zr     | 0.34      | 1.56     | 0.27    | 1.20     | 0.39    | 1.73    | 0.36    | 0.13    | 1.18    | 0.36    | 0.30    | 0.33     | (0.21) |
| Hf     | 0.01      | 0.03     | 0.01    | 0.05     | 0.01    | 0.07    | 0.01    | 0.01    | 0.05    | 0.01    | 0.01    | 0.01     | (0.00) |
| Y      | 0.56      | 1.63     | 0.19    | 1.44     | 1.23    | 2.79    | 0.52    | 0.49    | 2.37    | 0.97    | 0.22    | 0.10     | (0.05) |
| Sc     | 11.69     | 11.77    | 7.94    | 7.63     | 11.97   | 14.33   | 9.95    | 10.17   | 13.95   | 10.90   | 7.30    | 7.42     | (2.36) |
| V      | 56.46     | 63.28    | 73.44   | 37.68    | 57.98   | 75.92   | 47.91   | 64.72   | 73.32   | 48.43   | 33.99   | 25.81    | (9.15) |

§: Previously published whole rock analyses are available in Smith (1979), Smith (2010). \*: Previously published whole rock trace element analyses available in Roden et al., (1990).

Table DR2: Whole Rock major and trace elements

| Sample | EMGN27  | N17-GN§* | EMGN2   | EMMR25  | EMGN6   | EMGN29  | EMGN9   | EMGN37 | BHVO-2 |           |
|--------|---------|----------|---------|---------|---------|---------|---------|--------|--------|-----------|
|        | Group E | Group T  | Group T | Group T | Group T | Group T | Group T | N/A    |        |           |
|        |         |          |         |         |         |         |         |        |        | published |
| SiO2   | 42.02   | 45.61    | 44.76   | 44.95   | 44.53   | 46.04   | 43.58   | 40.52  | 49.88  | 49.90     |
| TiO2   | 0.00    | 0.01     | 0.04    | 0.05    | 0.02    | 0.01    | 0.02    | 0.00   | 2.76   | 2.73      |
| Al2O3  | 0.98    | 2.00     | 2.73    | 3.60    | 2.42    | 2.51    | 2.20    | 0.41   | 13.61  | 13.50     |
| Cr2O3  | 0.27    | 0.42     | 0.24    | 0.52    | 0.38    | 0.45    | 0.41    | 0.44   | 0.04   | 0.04      |
| FeO    | 6.74    | 7.27     | 7.60    | 7.60    | 6.77    | 7.14    | 7.28    | 7.18   | 11.18  | 11.07     |
| MnO    | 0.11    | 0.12     | 0.12    | 0.07    | 0.11    | 0.12    | 0.12    | 0.12   | 0.17   | 0.17      |
| MgO    | 41.53   | 40.93    | 39.01   | 29.85   | 36.76   | 37.76   | 38.77   | 44.44  | 7.30   | 7.23      |
| CaO    | 0.57    | 1.86     | 2.60    | 2.95    | 2.67    | 2.20    | 2.07    | 0.33   | 11.42  | 11.40     |
| Na2O   | 0.03    | 0.13     | 0.27    | 0.24    | 0.35    | 0.10    | 0.25    | 0.00   | 2.23   | 2.22      |
| K2O    | 0.02    | 0.01     | 0.02    | 0.10    | 0.04    | 0.01    | 0.05    | 0.00   | 0.52   | 0.52      |
| NiO    | 0.23    | 0.27     | 0.21    | 0.29    | 0.24    | 0.24    | 0.26    | 0.31   | 0.01   | 0.02      |
| P2O5   | 0.00    | 0.00     | 0.00    | 0.00    | 0.00    | 0.00    | 0.00    | 0.00   | 0.26   | 0.27      |
| LOI    | 6.78    | 1.67     | 1.31    | 8.76    | 5.47    | 2.90    | 4.52    | 5.82   | 0.00   | 0.00      |
| Total  | 99.29   | 100.31   | 98.92   | 98.98   | 99.76   | 99.47   | 99.52   | 99.59  | 99.37  | 99.06     |
| La     | 0.06    | 0.16     | 0.19    | 0.19    | 0.18    | 0.09    | 0.16    | 0.11   | 15.29  | 15.20     |
| Ce     | 0.07    | 0.23     | 0.30    | 0.36    | 0.37    | 0.11    | 0.29    | 0.14   | 36.95  | 37.50     |
| Pr     | 0.01    | 0.03     | 0.04    | 0.04    | 0.04    | 0.01    | 0.04    | 0.01   | 5.26   | 5.29      |
| Nd     | 0.03    | 0.08     | 0.15    | 0.19    | 0.17    | 0.02    | 0.15    | 0.03   | 24.14  | 24.50     |
| Sm     | 0.00    | 0.02     | 0.05    | 0.10    | 0.03    | 0.00    | 0.03    | 0.01   | 6.41   | 6.07      |
| Eu     | 0.00    | 0.00     | 0.03    | 0.04    | 0.01    | 0.00    | 0.02    | 0.00   | 2.19   | 2.07      |
| Gd     | 0.00    | 0.02     | 0.15    | 0.17    | 0.06    | 0.02    | 0.07    | 0.01   | 6.42   | 6.24      |
| Tb     | 0.00    | 0.01     | 0.04    | 0.04    | 0.01    | 0.01    | 0.01    | 0.00   | 1.02   | 0.94      |
| Dy     | 0.00    | 0.06     | 0.27    | 0.31    | 0.11    | 0.08    | 0.15    | 0.01   | 5.68   | 5.31      |
| Ho     | 0.00    | 0.02     | 0.07    | 0.08    | 0.03    | 0.02    | 0.04    | 0.00   | 1.05   | 0.97      |
| Er     | 0.00    | 0.07     | 0.20    | 0.24    | 0.11    | 0.08    | 0.12    | 0.01   | 2.61   | 2.54      |
| Tm     | 0.00    | 0.01     | 0.03    | 0.04    | 0.02    | 0.01    | 0.02    | 0.00   | 0.35   | 0.34      |
| Yb     | 0.01    | 0.09     | 0.22    | 0.24    | 0.14    | 0.11    | 0.14    | 0.01   | 1.94   | 2.00      |
| Lu     | 0.00    | 0.01     | 0.04    | 0.04    | 0.02    | 0.02    | 0.02    | 0.00   | 0.28   | 0.27      |
| Rb     | 0.49    | 0.22     | 0.34    | 1.03    | 0.35    | 0.23    | 0.46    | 0.40   | 8.94   | 9.08      |
| Pb     | 0.23    | 0.59     | 0.46    | 0.94    | 0.61    | 0.20    | 0.62    | 0.40   | 1.60   | 1.40      |
| Th     | 0.02    | 0.03     | 0.03    | 0.03    | 0.02    | 0.01    | 0.02    | 0.01   | 1.24   | 1.18      |
| U      | 0.01    | 0.01     | 0.02    | 3.70    | 0.02    | 0.03    | 0.03    | 0.01   | 0.42   | 0.44      |
| Nb     | 0.00    | 0.06     | 0.06    | 0.09    | 0.12    | 0.01    | 0.07    | 0.06   | 16.80  | 16.40     |
| Sr     | 7.74    | 19.84    | 28.17   | 118.99  | 19.56   | 17.36   | 20.88   | 10.52  | 394.86 | 396.00    |
| Zr     | 0.39    | 0.53     | 0.57    | 0.71    | 0.74    | 0.31    | 0.51    | 0.28   | 166.20 | 160.00    |
| Hf     | 0.01    | 0.01     | 0.03    | 0.03    | 0.02    | 0.00    | 0.01    | 0.01   | 4.42   | 4.10      |
| Y      | 0.31    | 0.48     | 1.76    | 2.07    | 0.89    | 0.59    | 0.92    | 0.06   | 25.60  | 23.00     |
| Sc     | 9.74    | 11.33    | 12.61   | 14.80   | 13.32   | 12.69   | 11.57   | 4.85   | 31.86  | 31.00     |
| V      | 28.12   | 57.29    | 60.74   | 89.63   | 58.94   | 66.48   | 54.46   | 21.67  | 312.47 | 317.00    |

§: Previously published whole rock analyses are available in Smith (1979), Smith (2010). \*: Previously published whole rock trace element analyses available in Roden et al., (1990).

**Table DR3: Whole rock Osmium isotope compositions.**

|          |             | $^{187}\text{Re}/^{188}\text{Os}$ | $^{187}\text{Os}/^{188}\text{Os}$ | Os   | Re   | Whole Rock $\text{Al}_2\text{O}_3$ | Rhenium Depletion<br>age (Ga) |
|----------|-------------|-----------------------------------|-----------------------------------|------|------|------------------------------------|-------------------------------|
| EMMR04   | Group D     | 1.82                              | 0.12053(4)                        | 4.99 | 1.92 | 2.00                               | 1.2                           |
| EMGN24   | Group D     | 0.49                              | 0.1260(3)                         | 3.89 | 0.40 | 2.54                               | 0.5                           |
| N23-GN   | Group D     | 0.37                              | 0.1272(2)                         | 3.31 | 0.26 | 4.45                               | 0.3                           |
| EMGN12   | Group D     | 0.19                              | 0.12428(5)                        | 4.46 | 0.17 | 1.72                               | 0.7                           |
| N178-GN  | Group E     | 0.27                              | 0.1188(10)                        | 2.97 | 0.17 | 0.81                               | 1.5                           |
| N178-GN* | Group E     | 0.08                              | 0.11521(6)                        | 2.70 | 0.04 | 0.81                               | 2.0                           |
| EMGN27   | Group E     | 0.22                              | 0.1171(5)                         | 2.88 | 0.13 | 0.98                               | 1.7                           |
| EMGN27*  | Group E     | nd                                | 0.11596(7)                        | 4.65 | nd   | 0.98                               | 1.9                           |
| EMMR25*  | Group T     | 0.24                              | 0.1287(2)                         | 2.98 | 0.15 | 3.60                               | 0.1                           |
| EMGN6    | Group T     | 0.65                              | 0.12704(3)                        | 3.57 | 0.49 | 2.42                               | 0.4                           |
| EMGN6*   | Group T     | 0.33                              | 0.12672(5)                        | 5.20 | 0.37 | 2.42                               | 0.4                           |
| EMGN2    | Group T     | 0.27                              | 0.12556(2)                        | 3.62 | 0.21 | 2.73                               | 0.6                           |
| EMGN9    | Group T     | nd                                | 0.12611(3)                        | 3.44 | nd   | 2.20                               | 0.5                           |
| EMGN9*   | Group T     | 0.15                              | 0.1256(5)                         | 3.14 | 0.10 | 2.20                               | 0.5                           |
| EMGN29   | Group T     | nd                                | 0.12663(3)                        | 3.27 | nd   | 2.51                               | 0.4                           |
| EMGN37   | N/A- no cpx | 9.84                              | 0.1140(1)                         | 0.76 | 1.59 | 0.41                               | 2.1                           |

\*: Sample digested at University of Bonn; *nd*: not determined

Table DR4: Sm-Nd isotope analyses

|                     |         | First Round (soft leach) |           |                                      |                                      | Second Round (hard leach) |           |                                      |                                      |
|---------------------|---------|--------------------------|-----------|--------------------------------------|--------------------------------------|---------------------------|-----------|--------------------------------------|--------------------------------------|
|                     |         | Sm (ppm)                 | Nd (ppm)  | <sup>147</sup> Sm/ <sup>144</sup> Nd | <sup>143</sup> Nd/ <sup>144</sup> Nd | Sm (ppm)                  | Nd (ppm)  | <sup>147</sup> Sm/ <sup>144</sup> Nd | <sup>143</sup> Nd/ <sup>144</sup> Nd |
| MR-ATG-13           | Group D | 0.215(1)                 | 0.199(1)  | 0.6541(35)                           | 0.517359(44)                         |                           |           |                                      |                                      |
| EMGN24              | Group D | 0.933(3)                 | 2.232(9)  | 0.2530(14)                           | 0.513432(2)                          |                           |           |                                      |                                      |
| N16-GN <sup>1</sup> | Group D | 0.886                    | 1.28      | 0.4180(42)                           | 0.514800(60)                         |                           |           |                                      |                                      |
| N61-GN <sup>1</sup> | Group D | 1.42                     | 3.89      | 0.2210(22)                           | 0.513102(25)                         |                           |           |                                      |                                      |
| N106-GN             | Group D |                          |           |                                      |                                      | 0.550(4)                  | 0.719(6)  | 0.4624(49)                           | 0.515414(5)                          |
| N126-GN             | Group D | 0.1050(3)                | 0.0270(1) | 2.3569(126)                          | 0.533395(14)                         | 0.189(1)                  | 0.0469(3) | 2.4298(259)                          | 0.533356(28)                         |
| N53-GN              | Group D |                          |           |                                      |                                      | 0.401(3)                  | 0.292(2)  | 0.8300(88)                           | 0.518925(13)                         |
| EMGN21              | Group E | 0.313(1)                 | 1.468(6)  | 0.1288(7)                            | 0.512474(4)                          |                           |           |                                      |                                      |
| N55-GN              | Group E | 0.184(1)                 | 0.975(4)  | 0.1143(6)                            | 0.512586(8)                          |                           |           |                                      |                                      |
| N178-GN             | Group E | 0.497(2)                 | 3.729(15) | 0.0805(4)                            | 0.512889(7)                          |                           |           |                                      |                                      |
| EMGN2               | Group T | 0.383(1)                 | 0.669(3)  | 0.3462(19)                           | 0.514290(3)                          | 0.252(2)                  | 0.654(5)  | 0.2335(25)                           | 0.514291(28)                         |
| N17-GN              | Group T | 0.0230(1)                | 0.154(1)  | 0.0921(5)                            | 0.513172(5)                          | 0.0193(1)                 | 0.106(1)  | 0.1103(12)                           | 0.513320(10)                         |

<sup>1</sup>: Roden, Smith and Murthy, (1990)

All concentrations determined via isotope dilution, errors are 2σ
